# Supplementary material for: Wavelength selective photoactivated autocatalytic oxidation of 5,12-dihydrobenzo[b]phenazine and its application in metal-free synthesis
Source: Royal Society of Chemistry journal article supplement (doi:10.1039/d0ra01495h), 2020-01-01
Supplement: d0ra01495h1.pdf [file d0ra01495h1.pdf]

## Electronic Supplementary Information

### Wavelength selective photoactivated autocatalytic oxidation of 5, 12-dihydrobenzo[b]phenazine and its application in metal-free synthesis

Lei Bian,<sup>a</sup> Jie Ma,<sup>a,b</sup> Xiaotong Feng,<sup>a</sup> Yuanhang Wang,<sup>a</sup> Lizhi Zhao,<sup>a</sup> Lei Zhao,<sup>a</sup> Xiayan Wang,<sup>c</sup> Guangsheng Guo<sup>c</sup> and Qiaosheng Pu<sup>\*,a</sup>

<sup>a</sup>State Key Laboratory of Applied Organic Chemistry, Key Laboratory of Nonferrous Metals Chemistry and Resources Utilization of Gansu Province, College of Chemistry and Chemical Engineering, Lanzhou University, Lanzhou, 730000, China.

<sup>b</sup>College of Chemical Engineering and Technology, Tianshui Normal University, Tianshui, 741001, China.

<sup>c</sup>Department of Chemistry and Chemical Engineering, Beijing University of Technology, Beijing, 100124, China.

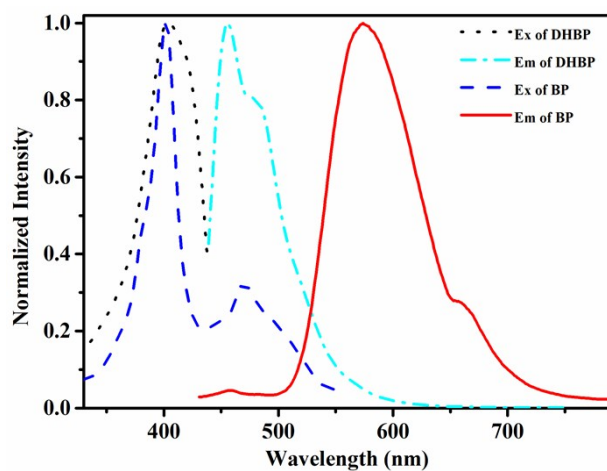

Figure (S1) Normalized emission spectrum and excitation spectrum of DHBP (1  $\mu\text{g/mL}$ ) and BP (1  $\mu\text{g/mL}$ ). Solvent: A.

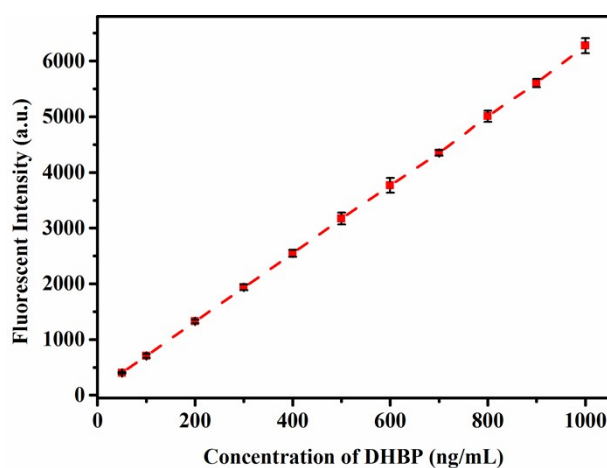

Figure (S2) Plots of fluorescence intensity ( $\lambda_{\text{ex}} = 408 \text{ nm} / \lambda_{\text{em}} = 455 \text{ nm}$ ) versus the concentration of DHBP. Error bar: ( $\pm$ ) SD.

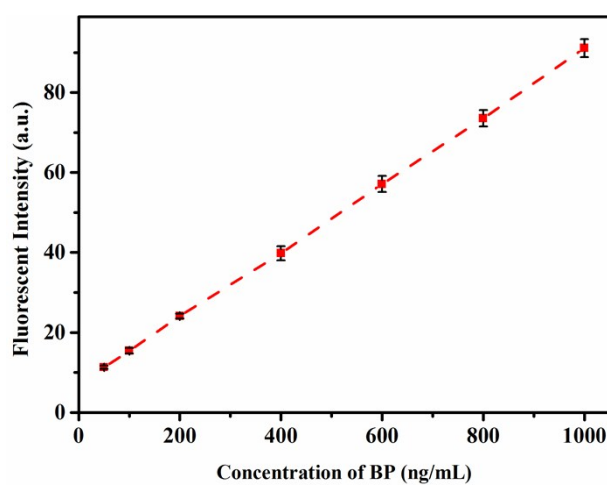

Figure (S3) Plots of fluorescence intensity ( $\lambda_{\text{ex}} = 470 \text{ nm} / \lambda_{\text{em}} = 576 \text{ nm}$ ) versus the concentration of BP. Error bar: ( $\pm$ ) SD.

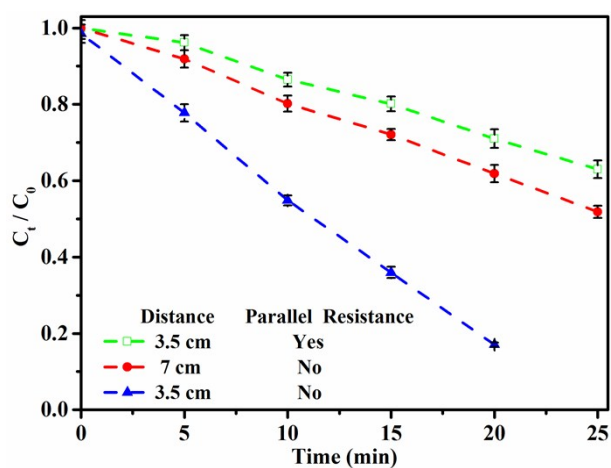

Figure (S4) Plots of  $C_t/C_0$  versus time illuminated by LED-391 under different light intensities. Error bar: ( $\pm$ ) SD. Experimental condition: LED-391, 10 °C, DHBP (1 mg/mL; 5mL), air, the parallel resistor: 10  $\Omega$ .

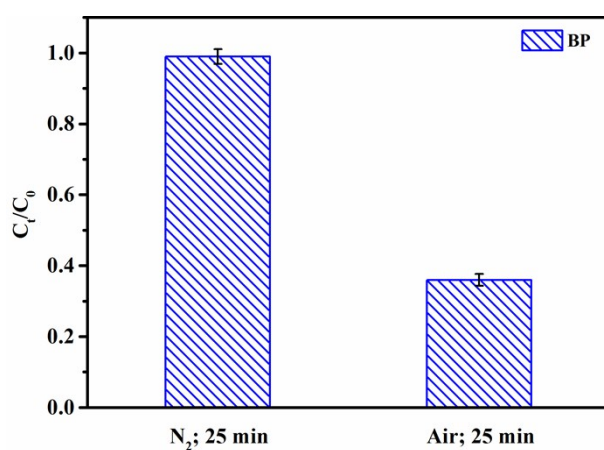

Figure (S5) BP's relative concentrations at different atmospheres after being illuminated by LED-516 for 25 minutes. Error bar: ( $\pm$ ) SD.

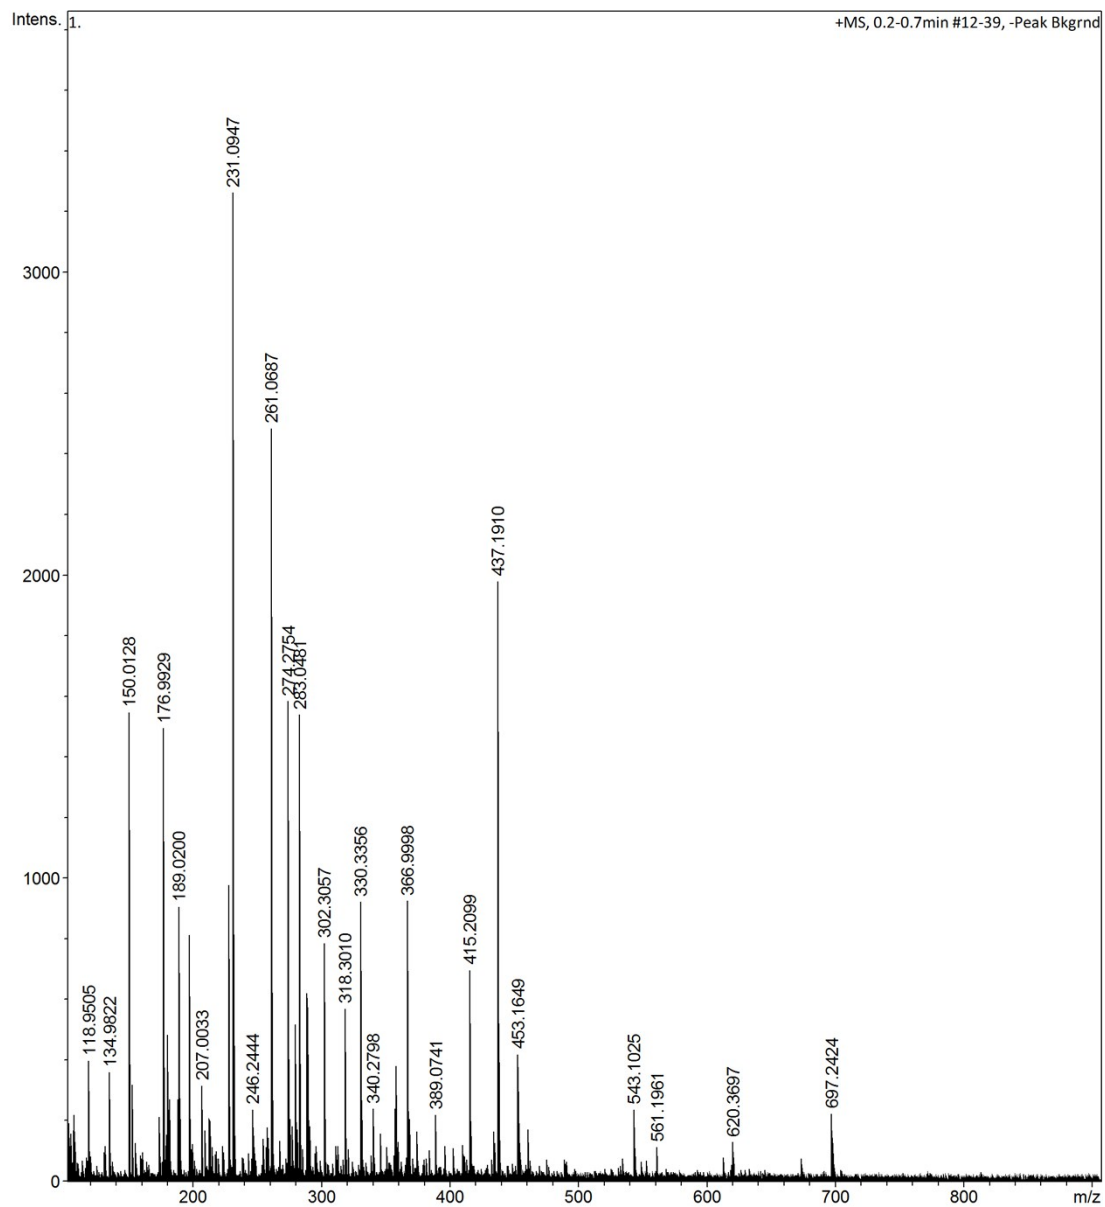

Figure (S6) Mass spectrometry of BP solution after being illuminated by LED-391 for 65 minutes. Experimental condition: LED-391, 10 °C, BP (the initial concentration was 1 mg/mL; 5mL), air.

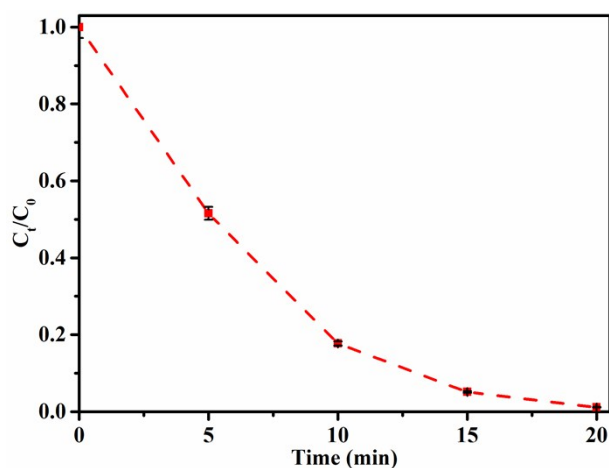

Figure (S7) Oxidation of DHBP in the mixed solution of DHBP and BP. Experimental conditions: the solvent was a mixture of DMSO and ethanol with volume ratio of 4:1, the concentration of DHBP or BP were  $10 \mu\text{g/mL}$  and LED-516 was used as light source. Error bar: ( $\pm$ ) SD.

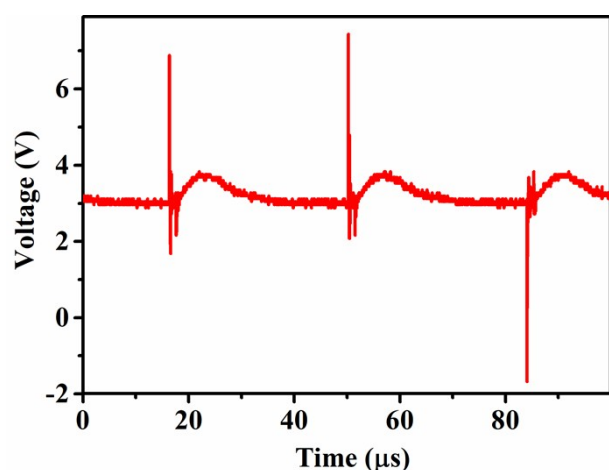

Figure (S8) Plots of voltage versus time when the LED-391 is working.

Table S1. Working voltages of LEDs in photochemical oxidation.

| LED         | 365  | 391  | 421  | 435  | 467  | 490  | 516  | 595  |
|-------------|------|------|------|------|------|------|------|------|
| Voltage (V) | 3.17 | 3.19 | 3.16 | 3.11 | 2.87 | 2.85 | 2.93 | 2.16 |

Table S2. Operational condition and characteristic of the light sources.

| LED                                           | 365             | 391   | 421   | 435   | 467   | 490   | 516   | 595   |
|-----------------------------------------------|-----------------|-------|-------|-------|-------|-------|-------|-------|
| Voltage (V)                                   | 3.33            | 3.20  | 3.21  | 3.15  | 2.93  | 3.01  | 3.12  | 2.25  |
| Current (A)                                   | 0.321           | 0.321 | 0.321 | 0.321 | 0.321 | 0.321 | 0.321 | 0.321 |
| Radiation power (W)                           | -- <sup>a</sup> | 0.617 | 0.685 | 0.649 | 0.504 | 0.372 | 0.228 | 0.067 |
| Radiation photon number ( $\mu\text{mol/s}$ ) | -- <sup>a</sup> | 2.03  | 2.43  | 2.38  | 1.98  | 1.54  | 0.99  | 0.33  |

<sup>a</sup> The emission wavelength of LED-365 is beyond the measurement range of the instrument.

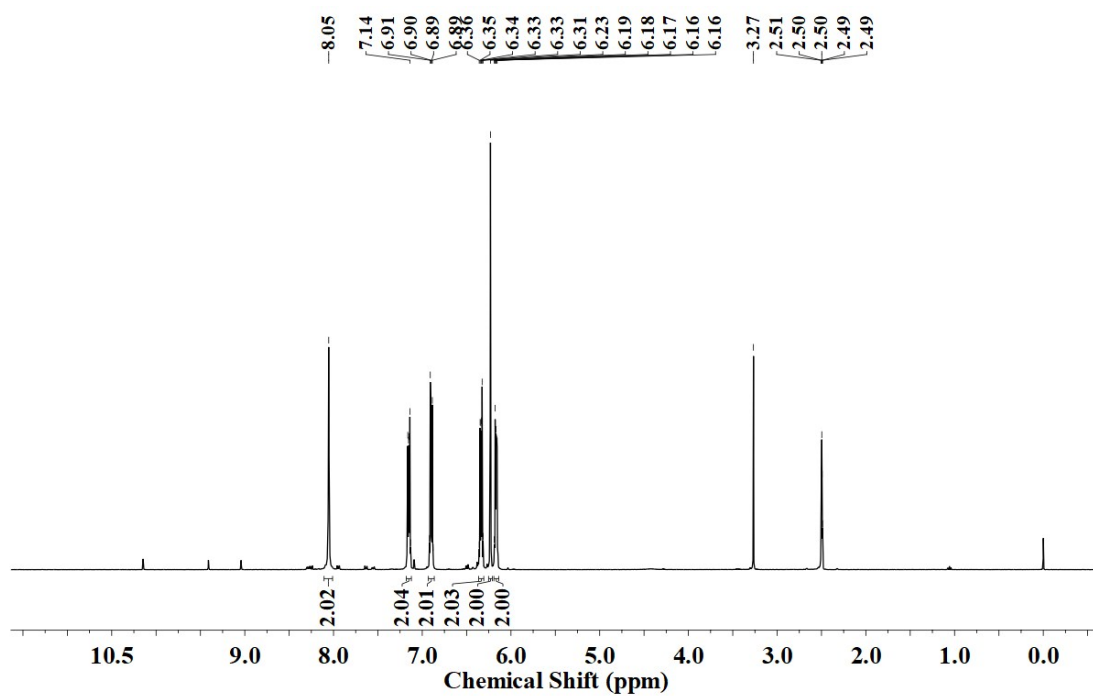

Figure (S9)  $^1\text{H}$  NMR of DHBP in DMSO- $d_6$ .

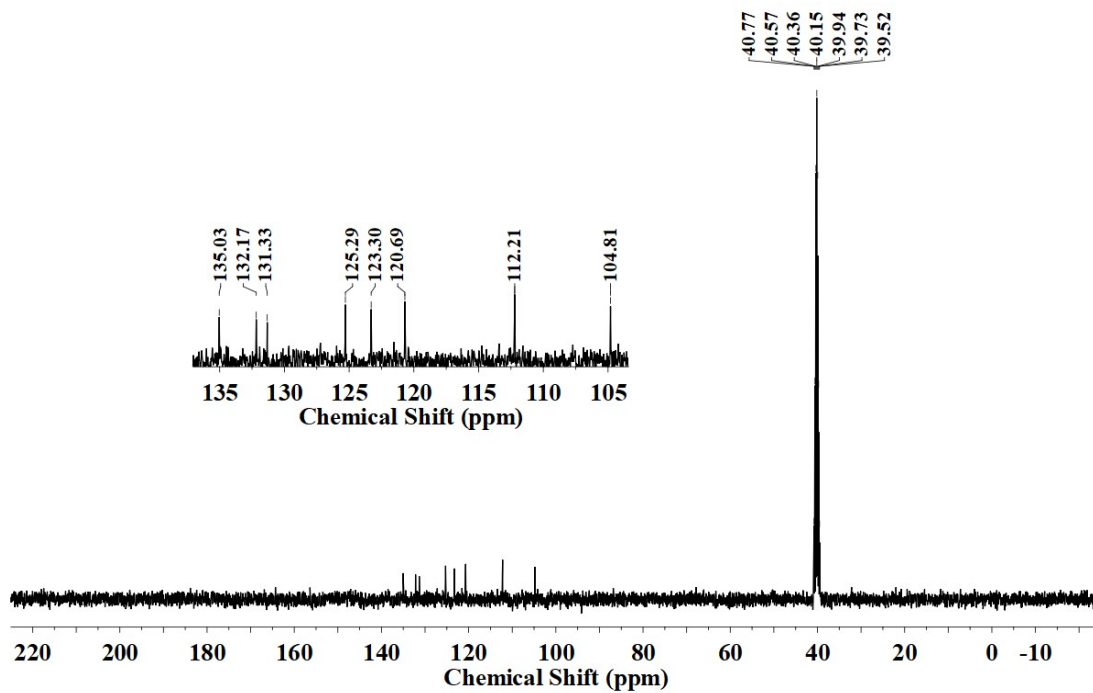

Figure (S10)  $^{13}\text{C}$  NMR of DHBP in DMSO- $d_6$ .

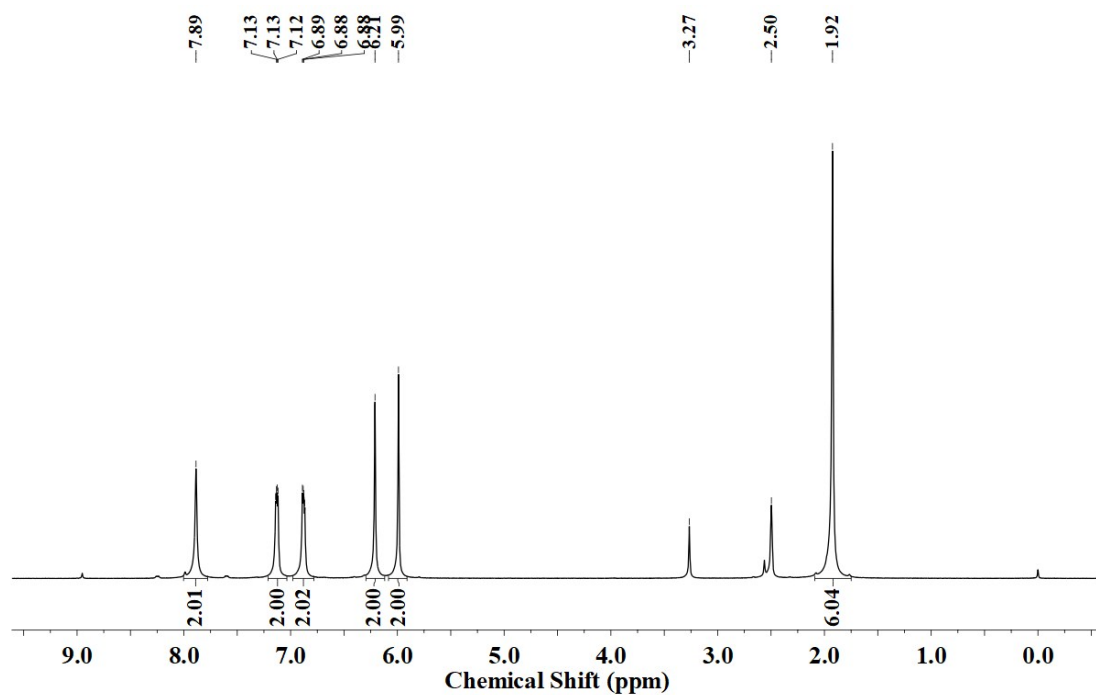

Figure (S11)  $^1\text{H}$  NMR of DMDHBP in DMSO- $d_6$ .

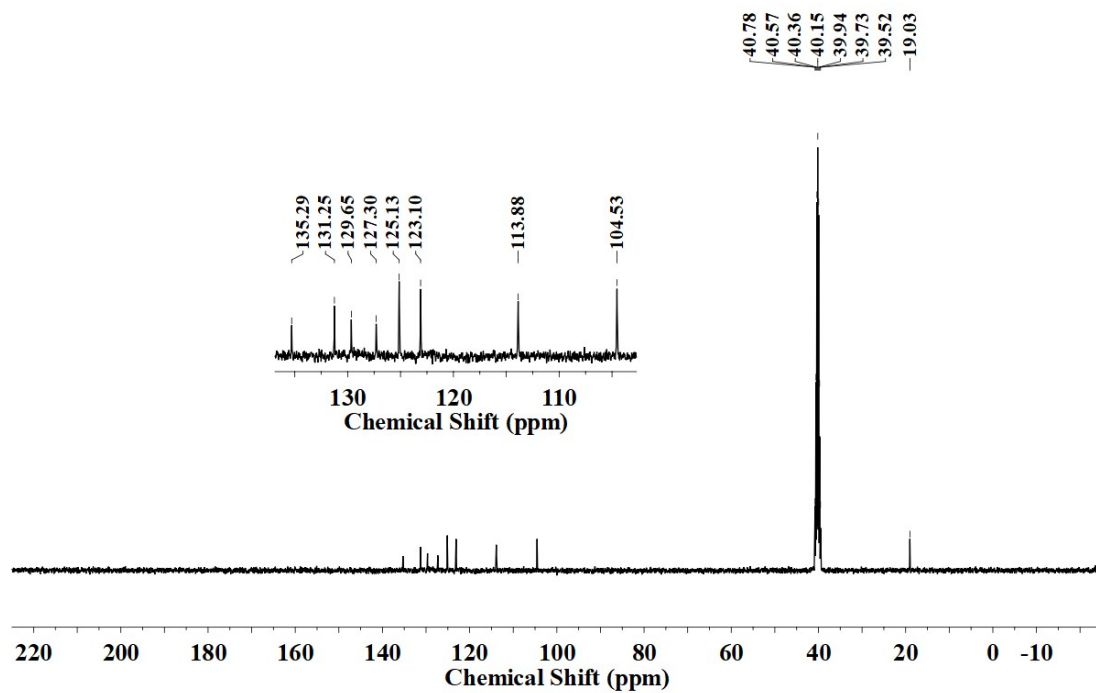

Figure (S12)  $^{13}\text{C}$  NMR of DMDHBP in DMSO- $d_6$ .

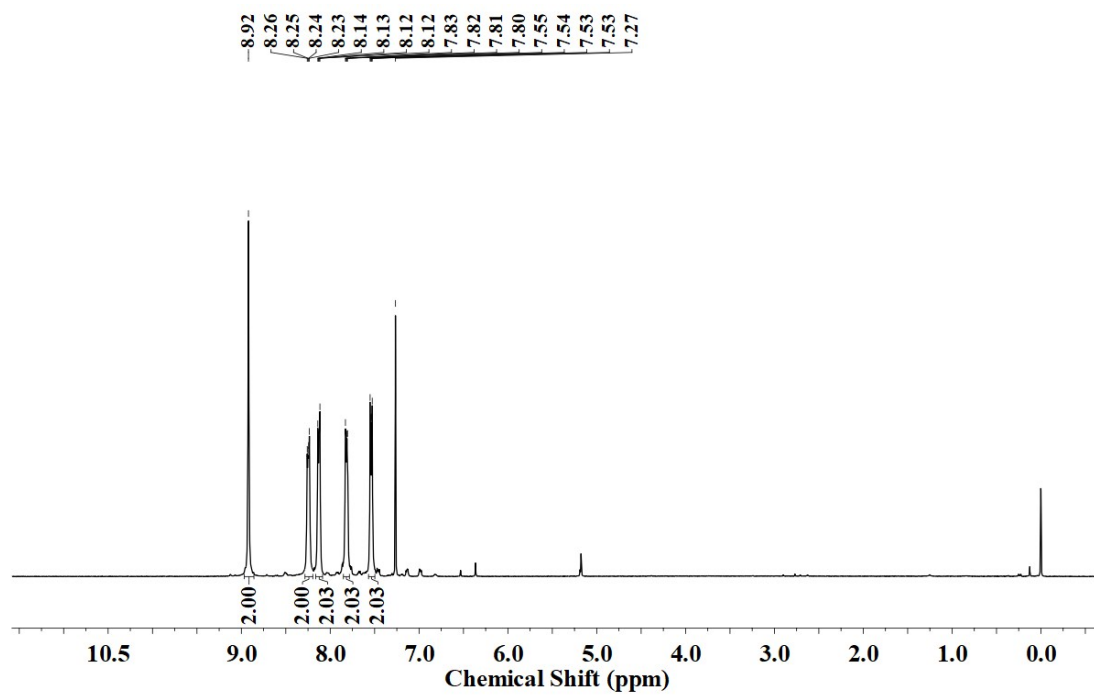

Figure (S13)  $^1\text{H}$  NMR of BP in  $\text{CDCl}_3$ .

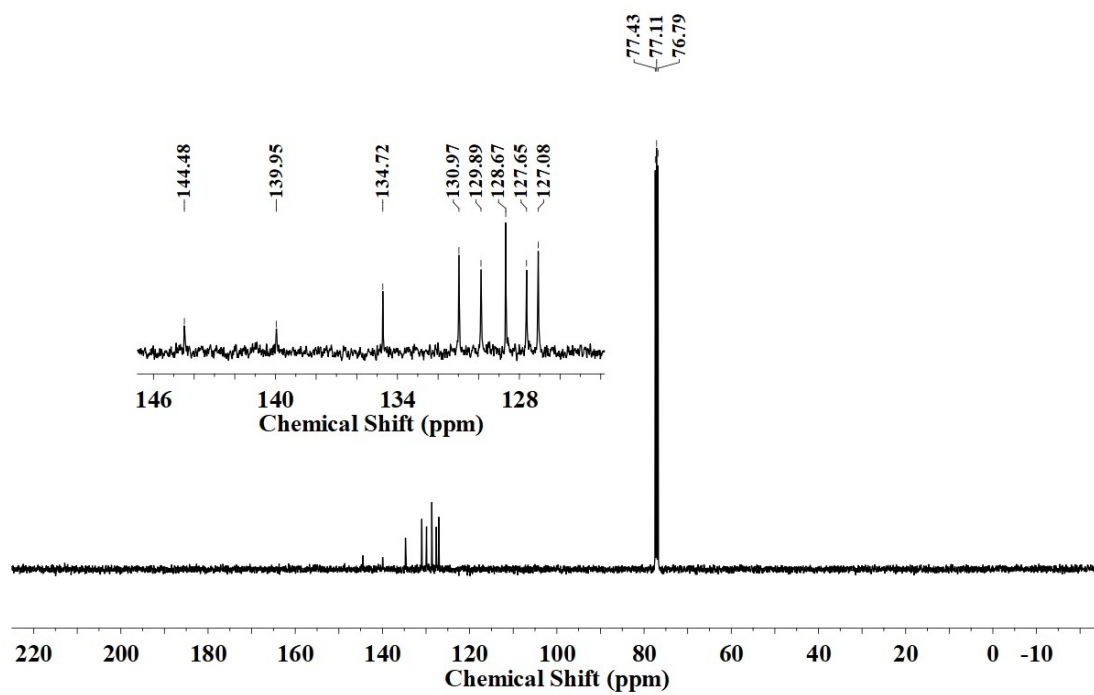



Figure (S14)  $^{13}\text{C}$  NMR of BP in  $\text{CDCl}_3$ .

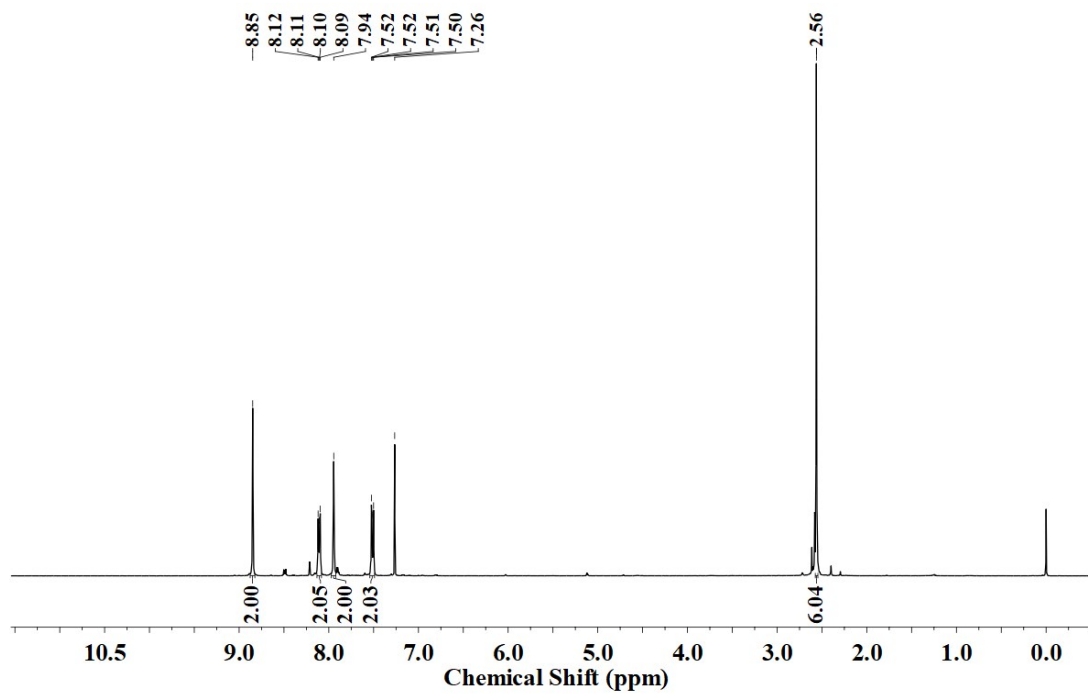

Figure (S15)  $^1\text{H}$  NMR of DMBP in  $\text{CDCl}_3$ .

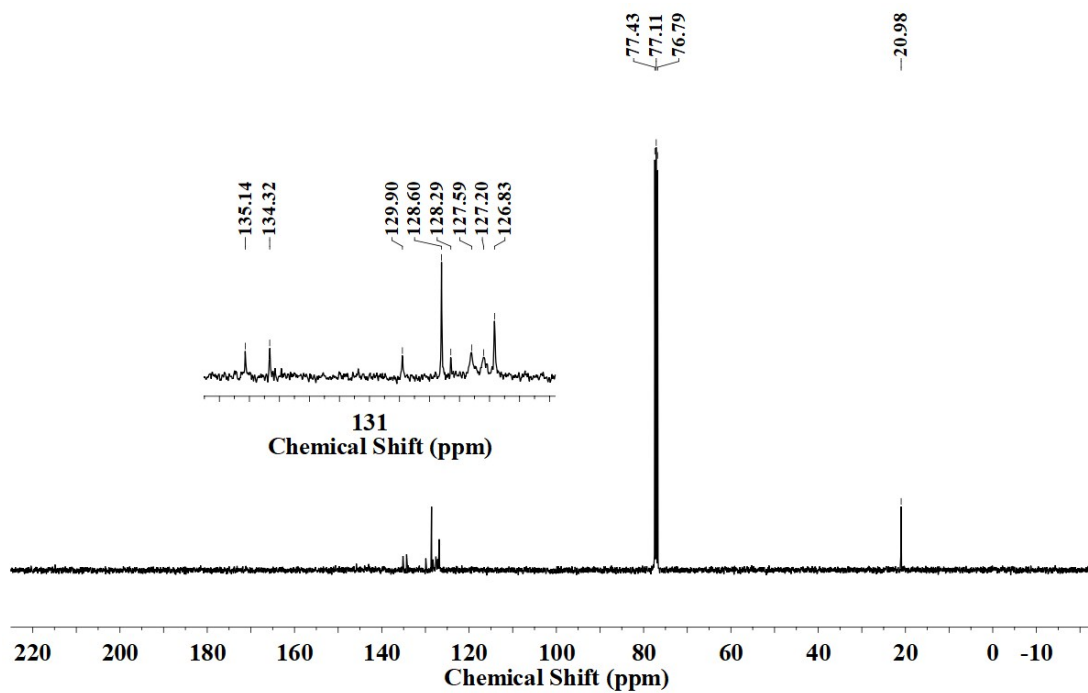

Figure (S16)  $^{13}\text{C}$  NMR of DMBP in  $\text{CDCl}_3$ .
